# Supplementary material
Source: PubMed Central journal article supplement (PMC5001156)
Supplement: NIHMS809452-supplement-Supplemental_Materials.pdf [file NIHMS809452-supplement-Supplemental_Materials.pdf]

**Supplemental Material:**

**Oligoclonal bands in MS reactive against two  
herpesviruses and association with MRI findings**

Virtanen JO, Wohler J, Fenton K, Reich DS, Jacobson S

**Contents:**

|                                                     |          |
|-----------------------------------------------------|----------|
| <b>Suppl Table 1. CSF findings of OIND patients</b> | <b>2</b> |
| <b>Suppl Fig 1.</b>                                 | <b>2</b> |
| <b>Suppl Fig 2.</b>                                 | <b>3</b> |
| <b>Suppl Fig 3.</b>                                 | <b>3</b> |

Suppl Table 1. CSF findings of OIND patients.

| Code | OCB | WBC | IgG Index | Diagnosis               |
|------|-----|-----|-----------|-------------------------|
| 1    | +   | 16  | 2.49      | unknown                 |
| 2    | +   | 4   | 0.51      | possible ADEM           |
| 3    | +   | 8   | 1.28      | HAM                     |
| 4    | -   | 3   | 0.50      | HAM                     |
| 5    | +   | N/A | N/A       | HAM                     |
| 6    | +   | N/A | 1.11      | HAM                     |
| 7    | +   | 10  | 0.87      | HAM                     |
| 8    | +   | 31  | 0.65      | HAM                     |
| 9    | +   | 130 | N/A       | Autoimmune Encephalitis |
| 10   | +   | 2   | 0.58      | Autoimmune Encephalitis |
| 11   | +   | 0   | N/A       | Autoimmune Encephalitis |
| 12   | +   | 3   | N/A       | Autoimmune Encephalitis |
| 13   | +   | 6   | N/A       | Autoimmune Encephalitis |
| 14   | +   | 99  | N/A       | Autoimmune Encephalitis |
| 15   | +   | 10  | N/A       | Autoimmune Encephalitis |

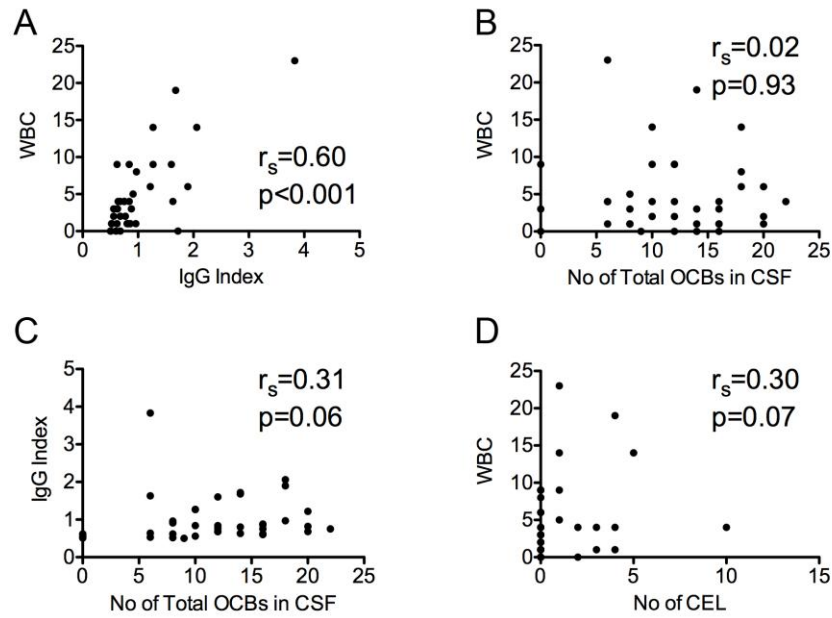

Suppl Fig 2.

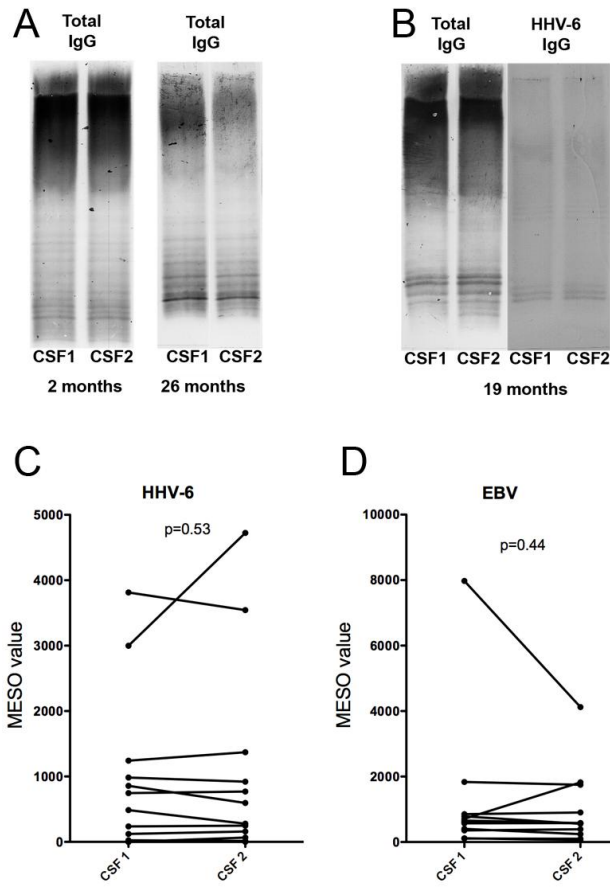

Suppl Fig 2.

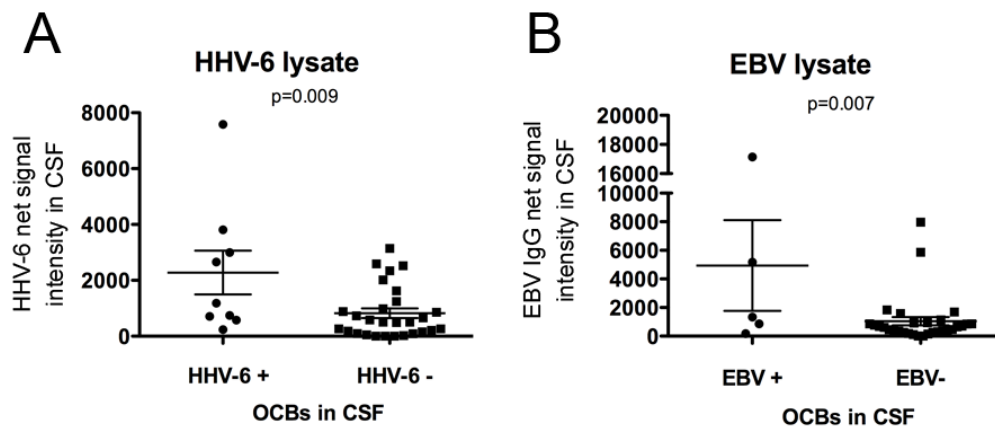

Suppl Fig 3.
